# Supplementary material for: Solvent effects on electrosynthesis, morphological and electrochromic properties of a nitrogen analog of PEDOT
Source: Royal Society of Chemistry journal article supplement (doi:10.1039/c5cp04721h), 2015-10-12
Supplement: c5cp04721h1.pdf [file c5cp04721h1.pdf]

## Solvent effects on electrosynthesis, morphological and electrochromic properties of a nitrogen analog of PEDOT

Shouli Ming, Zilan Feng, Daize Mo, Zhipeng Wang, Kaiwen Lin, Baoyang Lu\*,

Jingkun Xu\*

*School of Pharmacy, Jiangxi Science and Technology Normal University, Nanchang  
330013, China*

\*: Corresponding authors: Fax: +86-791-83823320; Tel.: +86-791-88537967;

Email: [lby1258@163.com](mailto:lby1258@163.com); [xujingkun@tsinghua.org.cn](mailto:xujingkun@tsinghua.org.cn).

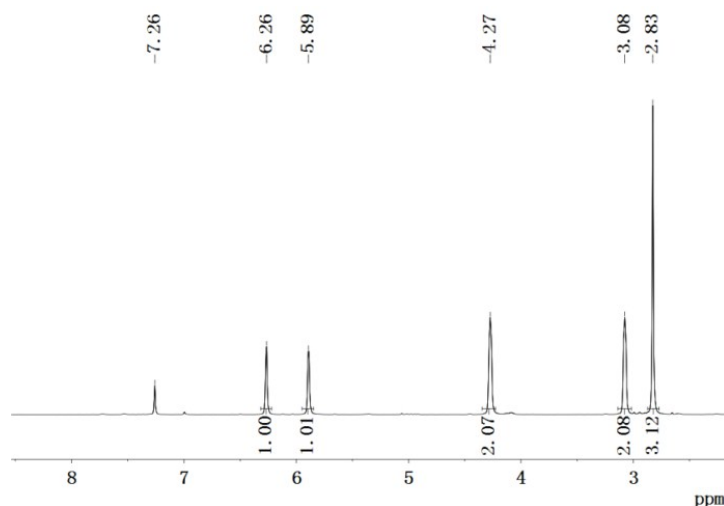

**Fig S1.** <sup>1</sup>H NMR spectrum of MDTO in CDCl<sub>3</sub>.

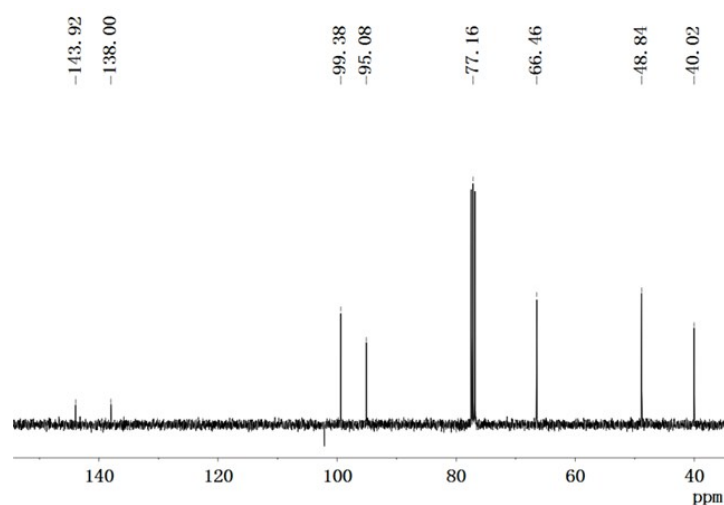

**Fig S2.** <sup>13</sup>C NMR spectrum of MDTO in CDCl<sub>3</sub>.

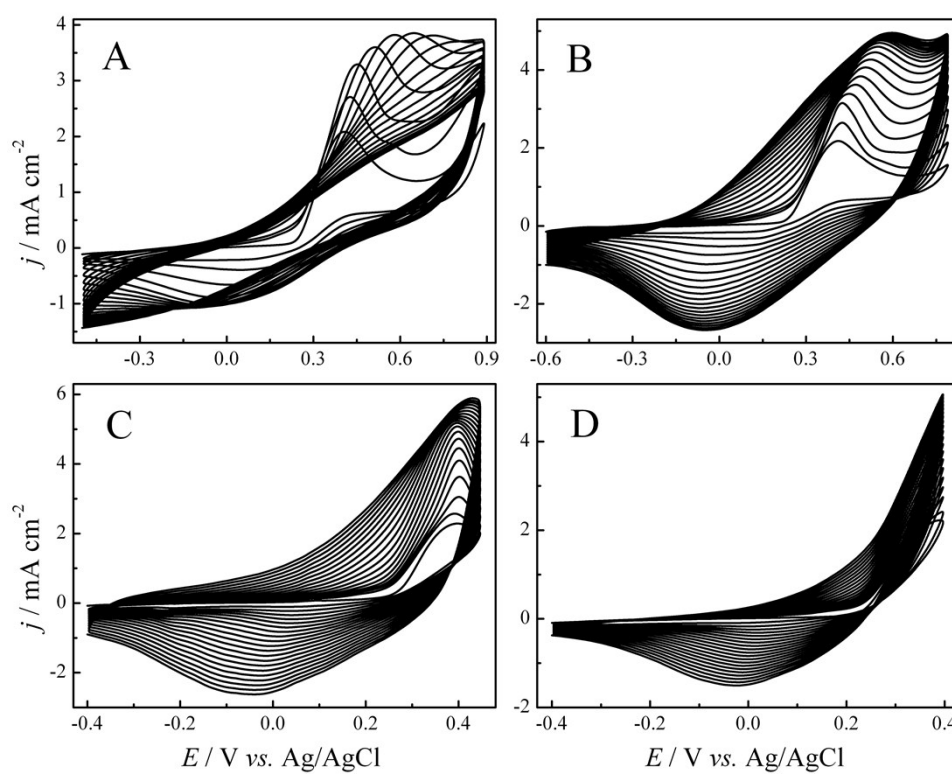

**Fig. S3** Electropolymerization of  $0.01 \text{ mol L}^{-1}$  MDTO in deionized water under different potential scanning ranges. Supporting electrolyte:  $0.1 \text{ mol L}^{-1} \text{ LiClO}_4$ .

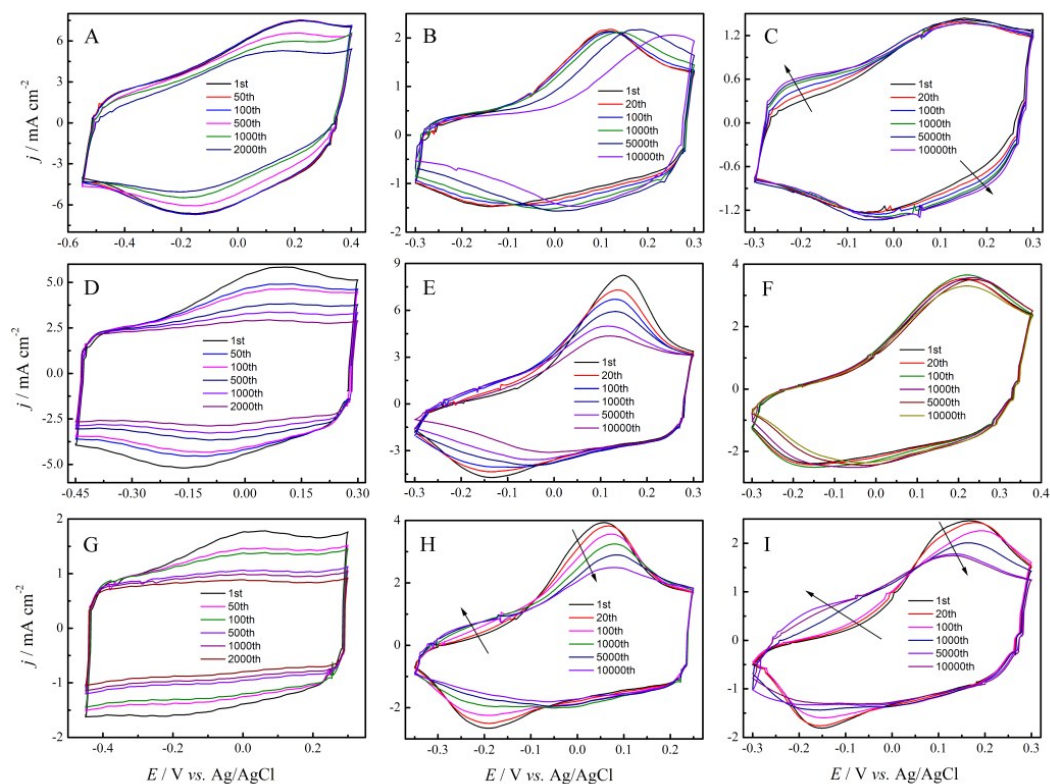

**Fig. S4** The long-term electrochemical activity of PMDTO in monomer-free DW (A, D and G), ACN (B, E and H) and PC (C, F and I). PMDTO prepared in DW (A, B and C); PMDTO prepared in ACN (D, E and F); PMDTO prepared in PC (G, H and I).

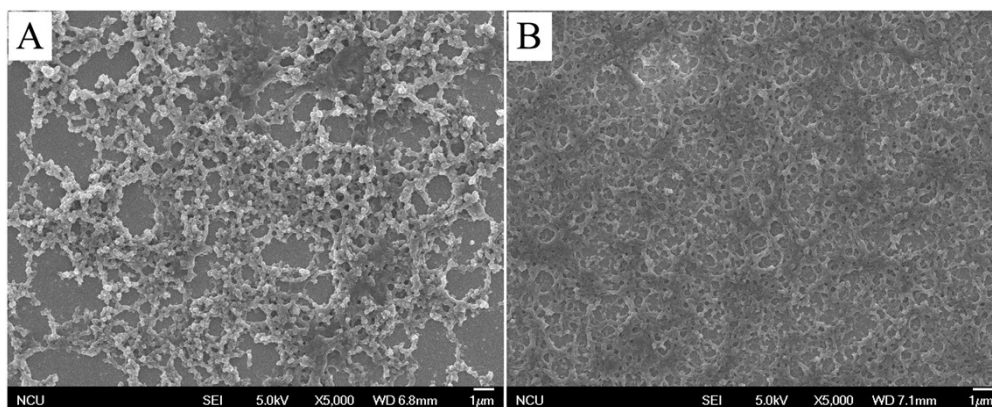

**Fig. S5** SEM images of PMDTO films deposited electrochemically on ITO electrode: PMDTO obtained in ACN (A) and BmimPF<sub>6</sub> (B) at magnification of 5000 $\times$ .
